# Supplementary material for: The radical scavenging activity of glycozolidol in physiological environments: a quantum chemical study
Source: Royal Society of Chemistry journal article supplement (doi:10.1039/d2ra05907j), 2022-01-01
Supplement: d2ra05907j1.pdf [file d2ra05907j1.pdf]

## Supporting Information (SI)

---

### The radical scavenging activity of glycozolidol in physiological environments: a quantum chemical study

Le Trung Hieu,<sup>1</sup> Mai Van Bay,<sup>2</sup> Nguyen Thi Hoa,<sup>3</sup> Adam Mechler<sup>4</sup> and Quan V. Vo<sup>3\*</sup>

<sup>1</sup>University of Sciences, Hue University, Thua Thien Hue 530000, Vietnam

<sup>2</sup>The University of Danang, University of Science and Education, Danang 550000, Vietnam

<sup>3</sup>The University of Danang - University of Technology and Education, Danang 550000, Vietnam.

<sup>4</sup>Department of Chemistry and Physics, La Trobe University, Victoria 3086, Australia.

\*Corresponding authors: [vvquan@ute.udn.vn](mailto:vvquan@ute.udn.vn)

### Table of Contents

|                                                                                                                                                                                                                               |    |
|-------------------------------------------------------------------------------------------------------------------------------------------------------------------------------------------------------------------------------|----|
| Table S1: The Cartesian coordinates and energies of TS of the reaction between compound GLD with HOO <sup>*</sup> following the FHT mechanism in studied environments (G: the gas phase; P: pentyl ethanoate; W: water) ..... | S2 |
|-------------------------------------------------------------------------------------------------------------------------------------------------------------------------------------------------------------------------------|----|

**Table S1: The Cartesian coordinates and energies of TS of the reaction between compound GLD with HOO<sup>•</sup> following the FHT mechanism in studied environments (G: the gas phase; P: pentyl ethanoate; W: water)**

| Name                  |             |             |             | GLD (gas)                                    |                             |
|-----------------------|-------------|-------------|-------------|----------------------------------------------|-----------------------------|
| Cartesian Coordinates |             |             |             | Frequency and Energy                         |                             |
| O                     | -4.09745100 | -0.20686700 | 0.00000000  | Zero-point correction=                       | 0.242014 (Hartree/Particle) |
| O                     | 4.87641300  | 1.52571500  | 0.00000000  | Thermal correction to Energy=                | 0.256750                    |
| N                     | 0.53040800  | -1.84774900 | 0.00000000  | Thermal correction to Enthalpy=              | 0.257694                    |
| C                     | 0.00000000  | 0.35477500  | 0.00000000  | Thermal correction to Gibbs Free Energy=     | 0.201087                    |
| C                     | 1.44114500  | 0.23277100  | 0.00000000  | Sum of electronic and zero-point Energies=   | -746.182118                 |
| C                     | -0.51820100 | -0.95187700 | 0.00000000  | Sum of electronic and thermal Energies=      | -746.167382                 |
| C                     | 1.72909700  | -1.14651900 | 0.00000000  | Sum of electronic and thermal Enthalpies=    | -746.166438                 |
| C                     | -0.88851500 | 1.43681500  | 0.00000000  | Sum of electronic and thermal Free Energies= | -746.223045                 |
| C                     | -2.25330300 | 1.22716600  | 0.00000000  |                                              |                             |
| C                     | -1.89353600 | -1.20475600 | 0.00000000  |                                              |                             |
| C                     | -2.74026800 | -0.10557500 | 0.00000000  |                                              |                             |
| C                     | 2.48832400  | 1.15936900  | 0.00000000  |                                              |                             |
| C                     | 3.04042400  | -1.61505900 | 0.00000000  |                                              |                             |
| C                     | 3.79169400  | 0.68997700  | 0.00000000  |                                              |                             |
| C                     | 4.06683400  | -0.68550200 | 0.00000000  |                                              |                             |
| C                     | -3.24101700 | 2.36142000  | 0.00000000  |                                              |                             |
| C                     | -4.66443800 | -1.49818500 | 0.00000000  |                                              |                             |
| H                     | 0.44289600  | -2.84912900 | 0.00000000  |                                              |                             |
| H                     | -0.50963400 | 2.45387300  | 0.00000000  |                                              |                             |
| H                     | -2.26885300 | -2.21887600 | 0.00000000  |                                              |                             |
| H                     | 2.28556000  | 2.22605900  | 0.00000000  |                                              |                             |
| H                     | 3.26037000  | -2.67614200 | 0.00000000  |                                              |                             |
| H                     | 5.10299700  | -0.99920200 | 0.00000000  |                                              |                             |
| H                     | -3.89052000 | 2.31626900  | 0.87726500  |                                              |                             |
| H                     | -2.71968900 | 3.31912300  | 0.00000000  |                                              |                             |
| H                     | -3.89052000 | 2.31626900  | -0.87726500 |                                              |                             |
| H                     | -5.74277000 | -1.35578100 | 0.00000000  |                                              |                             |
| H                     | -4.37108600 | -2.05818000 | -0.89376100 |                                              |                             |
| H                     | -4.37108600 | -2.05818000 | 0.89376100  |                                              |                             |
| H                     | 4.57834500  | 2.43844600  | 0.00000000  |                                              |                             |
| Name                  |             |             |             | GLD (P)                                      |                             |
| Cartesian Coordinates |             |             |             | Frequency and Energy                         |                             |
| O                     | -4.09886600 | -0.18094100 | 0.00000000  | Zero-point correction=                       | 0.241861 (Hartree/Particle) |
| O                     | 4.88555500  | 1.49280400  | 0.00000000  | Thermal correction to Energy=                | 0.256473                    |
| N                     | 0.51420700  | -1.84604700 | 0.00000000  | Thermal correction to Enthalpy=              | 0.257417                    |
| C                     | 0.00101600  | 0.36219200  | 0.00000000  | Thermal correction to Gibbs Free Energy=     | 0.201114                    |
| C                     | 1.44170200  | 0.22903800  | 0.00000000  | Sum of electronic and zero-point Energies=   | -746.204115                 |
| C                     | -0.52551100 | -0.94326300 | 0.00000000  | Sum of electronic and thermal Energies=      | -746.189503                 |
| C                     | 1.71599700  | -1.15542900 | 0.00000000  | Sum of electronic and thermal Enthalpies=    | -746.188558                 |
| C                     | -0.88157200 | 1.45116600  | 0.00000000  | Sum of electronic and thermal Free Energies= | -746.244861                 |
| C                     | -2.24817300 | 1.24777800  | 0.00000000  |                                              |                             |
| C                     | -1.90323900 | -1.18876000 | 0.00000000  |                                              |                             |
| C                     | -2.74438300 | -0.08468700 | 0.00000000  |                                              |                             |
| C                     | 2.49742500  | 1.14790800  | 0.00000000  |                                              |                             |
| C                     | 3.02396900  | -1.63632500 | 0.00000000  |                                              |                             |
| C                     | 3.79638100  | 0.66439900  | 0.00000000  |                                              |                             |
| C                     | 4.05901000  | -0.71480300 | 0.00000000  |                                              |                             |
| C                     | -3.22516000 | 2.39113400  | 0.00000000  |                                              |                             |
| C                     | -4.67169700 | -1.47638600 | 0.00000000  |                                              |                             |
| H                     | 0.41799300  | -2.84986400 | 0.00000000  |                                              |                             |

|                       |             |             |             |                                                          |
|-----------------------|-------------|-------------|-------------|----------------------------------------------------------|
| H                     | -0.49686700 | 2.46637500  | 0.00000000  |                                                          |
| H                     | -2.28178500 | -2.20199500 | 0.00000000  |                                                          |
| H                     | 2.30761800  | 2.21713700  | 0.00000000  |                                                          |
| H                     | 3.23178600  | -2.70006600 | 0.00000000  |                                                          |
| H                     | 5.09125500  | -1.04400900 | 0.00000000  |                                                          |
| H                     | -3.87531300 | 2.35681800  | 0.87812100  |                                                          |
| H                     | -2.69353900 | 3.34377400  | 0.00000000  |                                                          |
| H                     | -3.87531300 | 2.35681800  | -0.87812100 |                                                          |
| H                     | -5.75007500 | -1.32956900 | 0.00000100  |                                                          |
| H                     | -4.38207600 | -2.03640400 | -0.89437100 |                                                          |
| H                     | -4.38207600 | -2.03640300 | 0.89437100  |                                                          |
| H                     | 4.59134900  | 2.40988900  | 0.00000000  |                                                          |
| <b>Name</b>           |             |             |             | <b>GLD (W)</b>                                           |
| Cartesian Coordinates |             |             |             | Frequency and Energy                                     |
| O                     | -4.10427800 | -0.18284100 | 0.00000000  | Zero-point correction= 0.241333 (Hartree/Particle)       |
| O                     | 4.88858200  | 1.49901200  | 0.00000000  | Thermal correction to Energy= 0.255955                   |
| N                     | 0.51097600  | -1.84713200 | 0.00000000  | Thermal correction to Enthalpy= 0.256899                 |
| C                     | -0.00086200 | 0.36335900  | 0.00000000  | Thermal correction to Gibbs Free Energy= 0.200513        |
| C                     | 1.43939600  | 0.22939900  | 0.00000000  | Sum of electronic and zero-point Energies= -746.203519   |
| C                     | -0.52714400 | -0.94269000 | 0.00000000  | Sum of electronic and thermal Energies= -746.188897      |
| C                     | 1.71181200  | -1.15607200 | 0.00000000  | Sum of electronic and thermal Enthalpies= -746.187953    |
| C                     | -0.88073000 | 1.45446700  | 0.00000000  | Sum of electronic and thermal Free Energies= -746.244338 |
| C                     | -2.24815100 | 1.25063900  | 0.00000000  |                                                          |
| C                     | -1.90465300 | -1.18820400 | 0.00000000  |                                                          |
| C                     | -2.74176600 | -0.08231900 | 0.00000000  |                                                          |
| C                     | 2.49396600  | 1.14978200  | 0.00000000  |                                                          |
| C                     | 3.01908900  | -1.63921900 | 0.00000000  |                                                          |
| C                     | 3.79018400  | 0.66122800  | 0.00000000  |                                                          |
| C                     | 4.05468700  | -0.71728700 | 0.00000000  |                                                          |
| C                     | -3.22202900 | 2.39696500  | 0.00000000  |                                                          |
| C                     | -4.66975500 | -1.48816100 | 0.00000000  |                                                          |
| H                     | 0.41267300  | -2.85185400 | 0.00000000  |                                                          |
| H                     | -0.49397400 | 2.46876700  | 0.00000000  |                                                          |
| H                     | -2.28292700 | -2.20141800 | 0.00000000  |                                                          |
| H                     | 2.31094400  | 2.21976400  | 0.00000000  |                                                          |
| H                     | 3.22327500  | -2.70332600 | 0.00000000  |                                                          |
| H                     | 5.08639700  | -1.04864700 | 0.00000000  |                                                          |
| H                     | -3.87115200 | 2.36751100  | 0.87913600  |                                                          |
| H                     | -2.68507000 | 3.34607900  | 0.00000000  |                                                          |
| H                     | -3.87115200 | 2.36751100  | -0.87913600 |                                                          |
| H                     | -5.74833800 | -1.34732000 | 0.00000000  |                                                          |
| H                     | -4.37145100 | -2.04154200 | -0.89402300 |                                                          |
| H                     | -4.37145100 | -2.04154200 | 0.89402300  |                                                          |
| H                     | 4.59252200  | 2.41737200  | 0.00000000  |                                                          |
| <b>Name</b>           |             |             |             | <b>GLD-O9-RAD (G)</b>                                    |
| Cartesian Coordinates |             |             |             | Frequency and Energy                                     |
| O                     | -4.02400100 | -0.53942200 | 0.00000000  | Zero-point correction= 0.229746 (Hartree/Particle)       |
| O                     | 4.69737800  | 1.92716600  | 0.00000000  | Thermal correction to Energy= 0.243849                   |
| N                     | 0.74007300  | -1.74680100 | 0.00000000  | Thermal correction to Enthalpy= 0.244793                 |
| C                     | 0.00000000  | 0.39715400  | 0.00000000  | Thermal correction to Gibbs Free Energy= 0.188689        |
| C                     | 1.45490700  | 0.40568800  | 0.00000000  | Sum of electronic and zero-point Energies= -745.554611   |
| C                     | -0.39907000 | -0.94447700 | 0.00000000  | Sum of electronic and thermal Energies= -745.540507      |
| C                     | 1.85895400  | -0.96180500 | 0.00000000  | Sum of electronic and thermal Enthalpies= -745.539563    |
| C                     | -0.97917400 | 1.39326800  | 0.00000000  | Sum of electronic and thermal Free Energies= -745.595668 |

|                       |             |             |             |                                                          |
|-----------------------|-------------|-------------|-------------|----------------------------------------------------------|
| C                     | -2.32100100 | 1.05664300  | 0.00000000  |                                                          |
| C                     | -1.73778600 | -1.33054000 | 0.00000000  |                                                          |
| C                     | -2.68519000 | -0.31246900 | 0.00000000  |                                                          |
| C                     | 2.40559500  | 1.39789400  | 0.00000000  |                                                          |
| C                     | 3.21527000  | -1.35037100 | 0.00000000  |                                                          |
| C                     | 3.81153800  | 1.05227900  | 0.00000000  |                                                          |
| C                     | 4.16062300  | -0.36609000 | 0.00000000  |                                                          |
| C                     | -3.40712700 | 2.09626000  | 0.00000000  |                                                          |
| C                     | -4.47193900 | -1.87807300 | 0.00000000  |                                                          |
| H                     | 0.74046500  | -2.75372500 | 0.00000000  |                                                          |
| H                     | -0.69372200 | 2.43986600  | 0.00000000  |                                                          |
| H                     | -2.01583900 | -2.37541200 | 0.00000000  |                                                          |
| H                     | 2.15152500  | 2.45133700  | 0.00000000  |                                                          |
| H                     | 3.48933200  | -2.39938400 | 0.00000000  |                                                          |
| H                     | 5.21873600  | -0.59746100 | 0.00000000  |                                                          |
| H                     | -4.04908300 | 1.99013500  | 0.87734000  |                                                          |
| H                     | -2.97589600 | 3.09734300  | 0.00000000  |                                                          |
| H                     | -4.04908300 | 1.99013500  | -0.87734000 |                                                          |
| H                     | -5.55842400 | -1.83305800 | 0.00000000  |                                                          |
| H                     | -4.12957700 | -2.40814200 | -0.89433300 |                                                          |
| H                     | -4.12957700 | -2.40814200 | 0.89433300  |                                                          |
| <b>Name</b>           |             |             |             | <b>GLD-O9-RAD (P)</b>                                    |
| Cartesian Coordinates |             |             |             | Frequency and Energy                                     |
| O                     | -4.01102900 | -0.62082900 | 0.00000000  | Zero-point correction= 0.229809 (Hartree/Particle)       |
| O                     | 4.66079300  | 2.02204100  | 0.00000000  | Thermal correction to Energy= 0.243834                   |
| N                     | 0.77248700  | -1.72229400 | 0.00000000  | Thermal correction to Enthalpy= 0.244778                 |
| C                     | -0.01102200 | 0.40825600  | 0.00000000  | Thermal correction to Gibbs Free Energy= 0.188859        |
| C                     | 1.44372100  | 0.44388400  | 0.00000000  | Sum of electronic and zero-point Energies= -745.579407   |
| C                     | -0.38167600 | -0.94292300 | 0.00000000  | Sum of electronic and thermal Energies= -745.565383      |
| C                     | 1.87060400  | -0.92075900 | 0.00000000  | Sum of electronic and thermal Enthalpies= -745.564438    |
| C                     | -1.01087000 | 1.38455100  | 0.00000000  | Sum of electronic and thermal Free Energies= -745.620358 |
| C                     | -2.34573100 | 1.01687700  | 0.00000000  |                                                          |
| C                     | -1.71087100 | -1.35950000 | 0.00000000  |                                                          |
| C                     | -2.68127100 | -0.36185400 | 0.00000000  |                                                          |
| C                     | 2.37641900  | 1.45173300  | 0.00000000  |                                                          |
| C                     | 3.23578100  | -1.28448600 | 0.00000000  |                                                          |
| C                     | 3.78717600  | 1.12843100  | 0.00000000  |                                                          |
| C                     | 4.16178700  | -0.28264200 | 0.00000000  |                                                          |
| C                     | -3.45039300 | 2.03623500  | 0.00000000  |                                                          |
| C                     | -4.42529900 | -1.97688200 | 0.00000000  |                                                          |
| H                     | 0.79175900  | -2.73263700 | 0.00000000  |                                                          |
| H                     | -0.74904800 | 2.43767400  | 0.00000000  |                                                          |
| H                     | -1.96169800 | -2.41157300 | 0.00000000  |                                                          |
| H                     | 2.09681800  | 2.49938700  | 0.00000000  |                                                          |
| H                     | 3.52561100  | -2.32921300 | 0.00000000  |                                                          |
| H                     | 5.22315700  | -0.50240100 | 0.00000000  |                                                          |
| H                     | -4.09102600 | 1.92250800  | 0.87820900  |                                                          |
| H                     | -3.03606400 | 3.04503500  | 0.00000000  |                                                          |
| H                     | -4.09102600 | 1.92250700  | -0.87820900 |                                                          |
| H                     | -5.51327100 | -1.95945600 | 0.00000000  |                                                          |
| H                     | -4.07054000 | -2.49695100 | -0.89479800 |                                                          |
| H                     | -4.07054000 | -2.49695100 | 0.89479800  |                                                          |
| <b>Name</b>           |             |             |             | <b>GLD-O9-RAD (H)</b>                                    |
| Cartesian Coordinates |             |             |             | Frequency and Energy                                     |

|                       |             |             |             |                                              |                             |
|-----------------------|-------------|-------------|-------------|----------------------------------------------|-----------------------------|
| O                     | -4.01402100 | -0.62339400 | 0.00000000  | Zero-point correction=                       | 0.229817 (Hartree/Particle) |
| O                     | 4.66096000  | 2.02058200  | 0.00000000  | Thermal correction to Energy=                | 0.243768                    |
| N                     | 0.77209300  | -1.71980900 | 0.00000000  | Thermal correction to Enthalpy=              | 0.244712                    |
| C                     | -0.01368600 | 0.41272200  | 0.00000000  | Thermal correction to Gibbs Free Energy=     | 0.188950                    |
| C                     | 1.44064500  | 0.44632500  | 0.00000000  | Sum of electronic and zero-point Energies=   | -745.579048                 |
| C                     | -0.38361900 | -0.93834000 | 0.00000000  | Sum of electronic and thermal Energies=      | -745.565096                 |
| C                     | 1.86509200  | -0.92197300 | 0.00000000  | Sum of electronic and thermal Enthalpies=    | -745.564152                 |
| C                     | -1.01074700 | 1.39061100  | 0.00000000  | Sum of electronic and thermal Free Energies= | -745.619915                 |
| C                     | -2.34636400 | 1.02056700  | 0.00000000  |                                              |                             |
| C                     | -1.71004500 | -1.35729200 | 0.00000000  |                                              |                             |
| C                     | -2.67846400 | -0.35786200 | 0.00000000  |                                              |                             |
| C                     | 2.37267000  | 1.45163600  | 0.00000000  |                                              |                             |
| C                     | 3.23095900  | -1.28761400 | 0.00000000  |                                              |                             |
| C                     | 3.77743500  | 1.11950300  | 0.00000000  |                                              |                             |
| C                     | 4.15598200  | -0.28636200 | 0.00000000  |                                              |                             |
| C                     | -3.44875200 | 2.04225000  | 0.00000000  |                                              |                             |
| C                     | -4.41895000 | -1.98870500 | 0.00000000  |                                              |                             |
| H                     | 0.79038700  | -2.73222600 | 0.00000000  |                                              |                             |
| H                     | -0.74807500 | 2.44333400  | 0.00000000  |                                              |                             |
| H                     | -1.95894600 | -2.40962400 | 0.00000000  |                                              |                             |
| H                     | 2.09186400  | 2.49902700  | 0.00000000  |                                              |                             |
| H                     | 3.51734200  | -2.33265000 | 0.00000000  |                                              |                             |
| H                     | 5.21701800  | -0.50756500 | 0.00000000  |                                              |                             |
| H                     | -4.08866000 | 1.93221000  | 0.87927000  |                                              |                             |
| H                     | -3.02980900 | 3.04866300  | 0.00000000  |                                              |                             |
| H                     | -4.08866000 | 1.93221000  | -0.87927000 |                                              |                             |
| H                     | -5.50645600 | -1.97714700 | 0.00000000  |                                              |                             |
| H                     | -4.05622600 | -2.50065400 | -0.89460800 |                                              |                             |
| H                     | -4.05622600 | -2.50065400 | 0.89460800  |                                              |                             |
| <b>Name</b>           |             |             |             | <b>GLD-N-RAD (G)</b>                         |                             |
| Cartesian Coordinates |             |             |             | Frequency and Energy                         |                             |
| O                     | -4.08519000 | -0.20629500 | 0.00000000  | Zero-point correction=                       | 0.228731 (Hartree/Particle) |
| O                     | 4.91141800  | 1.37058400  | 0.00000000  | Thermal correction to Energy=                | 0.242919                    |
| N                     | 0.51888300  | -1.87449300 | 0.00000000  | Thermal correction to Enthalpy=              | 0.243864                    |
| C                     | 0.00000000  | 0.40103600  | 0.00000000  | Thermal correction to Gibbs Free Energy=     | 0.187609                    |
| C                     | 1.45113800  | 0.25273400  | 0.00000000  | Sum of electronic and zero-point Energies=   | -745.544791                 |
| C                     | -0.49365500 | -0.92080300 | 0.00000000  | Sum of electronic and thermal Energies=      | -745.530603                 |
| C                     | 1.66608800  | -1.16909200 | 0.00000000  | Sum of electronic and thermal Enthalpies=    | -745.529658                 |
| C                     | -0.88004000 | 1.47106400  | 0.00000000  | Sum of electronic and thermal Free Energies= | -745.585913                 |
| C                     | -2.25647900 | 1.24107800  | 0.00000000  |                                              |                             |
| C                     | -1.86225300 | -1.17958000 | 0.00000000  |                                              |                             |
| C                     | -2.73042100 | -0.08712700 | 0.00000000  |                                              |                             |
| C                     | 2.51620800  | 1.12319700  | 0.00000000  |                                              |                             |
| C                     | 2.97834400  | -1.68455800 | 0.00000000  |                                              |                             |
| C                     | 3.81415100  | 0.58030700  | 0.00000000  |                                              |                             |
| C                     | 4.04174900  | -0.80801500 | 0.00000000  |                                              |                             |
| C                     | -3.24984300 | 2.36802500  | 0.00000000  |                                              |                             |
| C                     | -4.63314400 | -1.50854500 | 0.00000000  |                                              |                             |
| H                     | -0.51919000 | 2.49487900  | 0.00000000  |                                              |                             |
| H                     | -2.20993200 | -2.20346600 | 0.00000000  |                                              |                             |
| H                     | 2.37728400  | 2.20047400  | 0.00000000  |                                              |                             |
| H                     | 3.13098700  | -2.75691100 | 0.00000000  |                                              |                             |
| H                     | 5.06713600  | -1.15416600 | 0.00000000  |                                              |                             |
| H                     | -3.89983400 | 2.31362700  | 0.87655500  |                                              |                             |

|                       |             |             |             |                                                          |
|-----------------------|-------------|-------------|-------------|----------------------------------------------------------|
| H                     | -2.73902900 | 3.33114000  | 0.00000000  |                                                          |
| H                     | -3.89983400 | 2.31362700  | -0.87655500 |                                                          |
| H                     | -5.71318400 | -1.38081300 | 0.00000000  |                                                          |
| H                     | -4.33086500 | -2.06338100 | -0.89332100 |                                                          |
| H                     | -4.33086500 | -2.06338100 | 0.89332100  |                                                          |
| H                     | 4.65426600  | 2.29719000  | 0.00000000  |                                                          |
| <b>Name</b>           |             |             |             | <b>GLD-N-RAD (P)</b>                                     |
| Cartesian Coordinates |             |             |             | Frequency and Energy                                     |
| O                     | -4.08986600 | -0.14178400 | 0.00000000  | Zero-point correction= 0.228746 (Hartree/Particle)       |
| O                     | 4.91904300  | 1.29446000  | 0.00000000  | Thermal correction to Energy= 0.242876                   |
| N                     | 0.48892900  | -1.88243800 | 0.00000000  | Thermal correction to Enthalpy= 0.243820                 |
| C                     | 0.00264500  | 0.39985800  | 0.00000000  | Thermal correction to Gibbs Free Energy= 0.187628        |
| C                     | 1.45037600  | 0.22947500  | 0.00000000  | Sum of electronic and zero-point Energies= -745.565515   |
| C                     | -0.51417300 | -0.91259200 | 0.00000000  | Sum of electronic and thermal Energies= -745.551385      |
| C                     | 1.64449400  | -1.19891000 | 0.00000000  | Sum of electronic and thermal Enthalpies= -745.550441    |
| C                     | -0.85966900 | 1.48671400  | 0.00000000  | Sum of electronic and thermal Free Energies= -745.606633 |
| C                     | -2.23978200 | 1.28003200  | 0.00000000  |                                                          |
| C                     | -1.88649900 | -1.14981200 | 0.00000000  |                                                          |
| C                     | -2.73747400 | -0.04138300 | 0.00000000  |                                                          |
| C                     | 2.52574500  | 1.08572300  | 0.00000000  |                                                          |
| C                     | 2.95335700  | -1.73456300 | 0.00000000  |                                                          |
| C                     | 3.81647100  | 0.52224100  | 0.00000000  |                                                          |
| C                     | 4.02574800  | -0.87306300 | 0.00000000  |                                                          |
| C                     | -3.20877100 | 2.42755300  | 0.00000000  |                                                          |
| C                     | -4.66000300 | -1.44095900 | 0.00000000  |                                                          |
| H                     | -0.47975600 | 2.50369600  | 0.00000000  |                                                          |
| H                     | -2.25875200 | -2.16574500 | 0.00000000  |                                                          |
| H                     | 2.40488800  | 2.16486400  | 0.00000000  |                                                          |
| H                     | 3.09662700  | -2.80894600 | 0.00000000  |                                                          |
| H                     | 5.04548400  | -1.23765600 | 0.00000000  |                                                          |
| H                     | -3.85951700 | 2.39201000  | 0.87774900  |                                                          |
| H                     | -2.67543900 | 3.37888100  | 0.00000000  |                                                          |
| H                     | -3.85951700 | 2.39201000  | -0.87774900 |                                                          |
| H                     | -5.73837500 | -1.29508200 | 0.00000000  |                                                          |
| H                     | -4.36887600 | -1.99937700 | -0.89436100 |                                                          |
| H                     | -4.36887600 | -1.99937700 | 0.89436100  |                                                          |
| H                     | 4.67562800  | 2.22890900  | 0.00000000  |                                                          |
| <b>Name</b>           |             |             |             | <b>GLD-N-RAD (H)</b>                                     |
| Cartesian Coordinates |             |             |             | Frequency and Energy                                     |
| O                     | -4.09539300 | -0.14198300 | 0.00000000  | Zero-point correction= 0.228602 (Hartree/Particle)       |
| O                     | 4.91183500  | 1.30267800  | 0.00000000  | Thermal correction to Energy= 0.242712                   |
| N                     | 0.48848000  | -1.88994300 | 0.00000000  | Thermal correction to Enthalpy= 0.243656                 |
| C                     | 0.00057200  | 0.39317800  | 0.00000000  | Thermal correction to Gibbs Free Energy= 0.187528        |
| C                     | 1.44735900  | 0.22399900  | 0.00000000  | Sum of electronic and zero-point Energies= -745.566966   |
| C                     | -0.51714200 | -0.91757300 | 0.00000000  | Sum of electronic and thermal Energies= -745.552857      |
| C                     | 1.64295700  | -1.20370800 | 0.00000000  | Sum of electronic and thermal Enthalpies= -745.551912    |
| C                     | -0.85670300 | 1.48406200  | 0.00000000  | Sum of electronic and thermal Free Energies= -745.608040 |
| C                     | -2.23761600 | 1.28096000  | 0.00000000  |                                                          |
| C                     | -1.88969800 | -1.15147100 | 0.00000000  |                                                          |
| C                     | -2.73504700 | -0.03949900 | 0.00000000  |                                                          |
| C                     | 2.51659900  | 1.08600600  | 0.00000000  |                                                          |
| C                     | 2.95445500  | -1.73619600 | 0.00000000  |                                                          |
| C                     | 3.80911200  | 0.52476000  | 0.00000000  |                                                          |
| C                     | 4.02290600  | -0.87134700 | 0.00000000  |                                                          |

|                       |             |             |             |                                                          |
|-----------------------|-------------|-------------|-------------|----------------------------------------------------------|
| C                     | -3.20058800 | 2.43361600  | 0.00000000  |                                                          |
| C                     | -4.66185100 | -1.44830800 | 0.00000000  |                                                          |
| H                     | -0.47097800 | 2.49855900  | 0.00000000  |                                                          |
| H                     | -2.27150200 | -2.16388500 | 0.00000000  |                                                          |
| H                     | 2.39654400  | 2.16445500  | 0.00000000  |                                                          |
| H                     | 3.10565300  | -2.80942600 | 0.00000000  |                                                          |
| H                     | 5.04354600  | -1.23333600 | 0.00000000  |                                                          |
| H                     | -3.85008300 | 2.40424100  | 0.87891800  |                                                          |
| H                     | -2.65908200 | 3.37970900  | 0.00000000  |                                                          |
| H                     | -3.85008300 | 2.40424100  | -0.87891800 |                                                          |
| H                     | -5.74004500 | -1.30542400 | 0.00000000  |                                                          |
| H                     | -4.36430300 | -2.00114400 | -0.89432000 |                                                          |
| H                     | -4.36430300 | -2.00114400 | 0.89432000  |                                                          |
| H                     | 4.66849000  | 2.23865900  | 0.00000000  |                                                          |
| <b>Name</b>           |             |             |             | <b>GLD-O9-HOO-PRE-COMPLEX (G)</b>                        |
| Cartesian Coordinates |             |             |             | Frequency and Energy                                     |
| O                     | -4.52821100 | 0.26563600  | 0.12484500  | Zero-point correction= 0.259503 (Hartree/Particle)       |
| O                     | 4.54378300  | 0.26501300  | -0.93103400 | Thermal correction to Energy= 0.277637                   |
| N                     | -0.24989800 | -2.13418900 | 0.31189100  | Thermal correction to Enthalpy= 0.278581                 |
| C                     | -0.42531700 | 0.03886400  | -0.30640800 | Thermal correction to Gibbs Free Energy= 0.212571        |
| C                     | 0.96876700  | -0.33955500 | -0.35584600 | Sum of electronic and zero-point Energies= -897.071247   |
| C                     | -1.13854800 | -1.09733400 | 0.11136200  | Sum of electronic and thermal Energies= -897.053114      |
| C                     | 1.03532200  | -1.69302300 | 0.03440000  | Sum of electronic and thermal Enthalpies= -897.052169    |
| C                     | -1.12437300 | 1.22380600  | -0.56954600 | Sum of electronic and thermal Free Energies= -897.118179 |
| C                     | -2.49506100 | 1.27750400  | -0.41922400 |                                                          |
| C                     | -2.52713900 | -1.08252800 | 0.27392100  |                                                          |
| C                     | -3.18333800 | 0.11013500  | 0.00532300  |                                                          |
| C                     | 2.14376900  | 0.34245600  | -0.69959900 |                                                          |
| C                     | 2.24972200  | -2.37310700 | 0.09019100  |                                                          |
| C                     | 3.35749700  | -0.33288900 | -0.62282400 |                                                          |
| C                     | 3.40548600  | -1.68178200 | -0.23371900 |                                                          |
| C                     | -3.28455600 | 2.52919500  | -0.68615600 |                                                          |
| C                     | -5.28823700 | -0.84280100 | 0.55514000  |                                                          |
| H                     | -0.49299200 | -3.06079500 | 0.61698200  |                                                          |
| H                     | -0.59077900 | 2.11219900  | -0.89219200 |                                                          |
| H                     | -3.05560900 | -1.96951300 | 0.59498200  |                                                          |
| H                     | 2.11577700  | 1.37194800  | -1.04281000 |                                                          |
| H                     | 2.29827000  | -3.41396900 | 0.38836100  |                                                          |
| H                     | 4.37400300  | -2.16344300 | -0.18965700 |                                                          |
| H                     | -3.83041100 | 2.84493100  | 0.20589200  |                                                          |
| H                     | -2.62214500 | 3.33795800  | -0.99556200 |                                                          |
| H                     | -4.02735700 | 2.36529500  | -1.47026000 |                                                          |
| H                     | -6.32135000 | -0.50478200 | 0.59297600  |                                                          |
| H                     | -5.20329000 | -1.67615700 | -0.14962600 |                                                          |
| H                     | -4.97529100 | -1.17232900 | 1.55104700  |                                                          |
| H                     | 4.46674100  | 1.21166700  | -0.76188700 |                                                          |
| O                     | 3.78042400  | 2.42229300  | 0.89245800  |                                                          |
| O                     | 3.05734100  | 1.81184100  | 1.78726500  |                                                          |
| H                     | 2.62305200  | 1.06440300  | 1.31814000  |                                                          |
| <b>Name</b>           |             |             |             | <b>GLD-O9-HOO-PRE-COMPLEX (P)</b>                        |
| Cartesian Coordinates |             |             |             | Frequency and Energy                                     |
| O                     | -4.53420200 | 0.23799300  | 0.15271300  | Zero-point correction= 0.258372 (Hartree/Particle)       |
| O                     | 4.52477400  | 0.34155100  | -1.01647500 | Thermal correction to Energy= 0.276719                   |
| N                     | -0.22609700 | -2.09994900 | 0.29846100  | Thermal correction to Enthalpy= 0.277663                 |

|                              |             |             |             |                                              |                             |
|------------------------------|-------------|-------------|-------------|----------------------------------------------|-----------------------------|
| C                            | -0.43377700 | 0.07043900  | -0.32353300 | Thermal correction to Gibbs Free Energy=     | 0.211245                    |
| C                            | 0.96336800  | -0.29276500 | -0.39195400 | Sum of electronic and zero-point Energies=   | -897.098661                 |
| C                            | -1.12737100 | -1.07578400 | 0.10677300  | Sum of electronic and thermal Energies=      | -897.080314                 |
| C                            | 1.04733200  | -1.64615400 | 0.00194900  | Sum of electronic and thermal Enthalpies=    | -897.079370                 |
| C                            | -1.15191100 | 1.24610700  | -0.58414000 | Sum of electronic and thermal Free Energies= | -897.145789                 |
| C                            | -2.52226700 | 1.27993500  | -0.41875200 |                                              |                             |
| C                            | -2.51522600 | -1.07945200 | 0.28581800  |                                              |                             |
| C                            | -3.19110700 | 0.10309000  | 0.01929800  |                                              |                             |
| C                            | 2.12788100  | 0.40372500  | -0.74711200 |                                              |                             |
| C                            | 2.27024000  | -2.31386800 | 0.04583100  |                                              |                             |
| C                            | 3.34578900  | -0.26462400 | -0.69102400 |                                              |                             |
| C                            | 3.41453000  | -1.61235100 | -0.29792000 |                                              |                             |
| C                            | -3.32785900 | 2.52078000  | -0.68696700 |                                              |                             |
| C                            | -5.27596700 | -0.89197100 | 0.57804600  |                                              |                             |
| H                            | -0.45531200 | -3.03291300 | 0.60570200  |                                              |                             |
| H                            | -0.63457700 | 2.14056200  | -0.91728300 |                                              |                             |
| H                            | -3.02601100 | -1.97306500 | 0.61851200  |                                              |                             |
| H                            | 2.08265900  | 1.43717800  | -1.07782900 |                                              |                             |
| H                            | 2.33097700  | -3.35273900 | 0.34922500  |                                              |                             |
| H                            | 4.38615400  | -2.09029900 | -0.26531700 |                                              |                             |
| H                            | -3.87180200 | 2.84058900  | 0.20566600  |                                              |                             |
| H                            | -2.67485000 | 3.33487100  | -1.00449400 |                                              |                             |
| H                            | -4.07282700 | 2.34936500  | -1.46839200 |                                              |                             |
| H                            | -6.31562400 | -0.57275200 | 0.61919000  |                                              |                             |
| H                            | -5.17832500 | -1.71694600 | -0.13425200 |                                              |                             |
| H                            | -4.95836800 | -1.22197300 | 1.57178000  |                                              |                             |
| H                            | 4.40845700  | 1.29821100  | -0.97776400 |                                              |                             |
| O                            | 3.76129000  | 2.34689100  | 1.09463600  |                                              |                             |
| O                            | 3.13832200  | 1.53705400  | 1.90400400  |                                              |                             |
| H                            | 2.69873400  | 0.86899300  | 1.32912000  |                                              |                             |
| <b>Name</b>                  |             |             |             | <b>GLD-O9-HOO-PRE-COMPLEX (H)</b>            |                             |
| <b>Cartesian Coordinates</b> |             |             |             | <b>Frequency and Energy</b>                  |                             |
| O                            | -4.55581500 | 0.38625300  | 0.11518100  | Zero-point correction=                       | 0.259136 (Hartree/Particle) |
| O                            | 4.53979700  | 0.02516700  | -0.79860400 | Thermal correction to Energy=                | 0.277177                    |
| N                            | -0.38348400 | -2.18611200 | 0.31492300  | Thermal correction to Enthalpy=              | 0.278121                    |
| C                            | -0.45118900 | 0.00687500  | -0.26470300 | Thermal correction to Gibbs Free Energy=     | 0.212585                    |
| C                            | 0.92570200  | -0.43138700 | -0.29838500 | Sum of electronic and zero-point Energies=   | -897.095805                 |
| C                            | -1.21890000 | -1.10942500 | 0.11823500  | Sum of electronic and thermal Energies=      | -897.077764                 |
| C                            | 0.92164800  | -1.79418000 | 0.06887700  | Sum of electronic and thermal Enthalpies=    | -897.076820                 |
| C                            | -1.09519400 | 1.22827200  | -0.50731600 | Sum of electronic and thermal Free Energies= | -897.142356                 |
| C                            | -2.46670300 | 1.33374800  | -0.37308300 |                                              |                             |
| C                            | -2.60929700 | -1.04246600 | 0.25788100  |                                              |                             |
| C                            | -3.20925600 | 0.18295000  | 0.00942000  |                                              |                             |
| C                            | 2.13499800  | 0.20379300  | -0.61041400 |                                              |                             |
| C                            | 2.10295800  | -2.53133800 | 0.14095000  |                                              |                             |
| C                            | 3.30843800  | -0.53206900 | -0.51916400 |                                              |                             |
| C                            | 3.29472500  | -1.88729700 | -0.15130400 |                                              |                             |
| C                            | -3.19088400 | 2.62984100  | -0.61236800 |                                              |                             |
| C                            | -5.36406100 | -0.72347700 | 0.48951600  |                                              |                             |
| H                            | -0.67418200 | -3.11113800 | 0.59692500  |                                              |                             |
| H                            | -0.51975000 | 2.10182500  | -0.79802600 |                                              |                             |
| H                            | -3.17364400 | -1.91777400 | 0.54969400  |                                              |                             |
| H                            | 2.16246600  | 1.24201800  | -0.93033500 |                                              |                             |
| H                            | 2.09282300  | -3.57762600 | 0.42315200  |                                              |                             |



|                       |             |             |             |                                                          |
|-----------------------|-------------|-------------|-------------|----------------------------------------------------------|
| H                     | 4.23644100  | -2.42065500 | -0.09793200 |                                                          |
| H                     | -3.72832700 | 2.95437600  | 0.28272100  |                                                          |
| H                     | -2.48291800 | 3.41109100  | -0.89068900 |                                                          |
| H                     | -3.93050200 | 2.53206600  | -1.41150300 |                                                          |
| H                     | -6.38542100 | -0.35100600 | 0.52744900  |                                                          |
| H                     | -5.29180500 | -1.52321600 | -0.25218800 |                                                          |
| H                     | -5.07471000 | -1.10234200 | 1.47299100  |                                                          |
| H                     | 4.45983800  | 0.98995800  | -0.78546300 |                                                          |
| O                     | 4.06865400  | 2.62720100  | 0.55068000  |                                                          |
| O                     | 3.39523400  | 2.15082500  | 1.55615900  |                                                          |
| H                     | 2.91319800  | 1.35660900  | 1.23256500  |                                                          |
| <b>Name</b>           |             |             |             | <b>GLD-O9-HOO-POST-COMPLEX (G)</b>                       |
| Cartesian Coordinates |             |             |             | Frequency and Energy                                     |
| O                     | -5.00833100 | -0.13520700 | 0.06540300  | Zero-point correction= 0.259546 (Hartree/Particle)       |
| O                     | 3.90066000  | 1.46468600  | -0.12859200 | Thermal correction to Energy= 0.277844                   |
| N                     | -0.38785200 | -1.80586200 | -0.08403500 | Thermal correction to Enthalpy= 0.278789                 |
| C                     | -0.91486600 | 0.39974900  | -0.02321500 | Thermal correction to Gibbs Free Energy= 0.210711        |
| C                     | 0.53331800  | 0.26462100  | -0.06125600 | Sum of electronic and zero-point Energies= -897.078660   |
| C                     | -1.44431900 | -0.89513100 | -0.03863200 | Sum of electronic and thermal Energies= -897.060362      |
| C                     | 0.80065300  | -1.13756400 | -0.09785100 | Sum of electronic and thermal Enthalpies= -897.059417    |
| C                     | -1.78902700 | 1.48754100  | 0.02307100  | Sum of electronic and thermal Free Energies= -897.127495 |
| C                     | -3.15732500 | 1.28448000  | 0.05232600  |                                                          |
| C                     | -2.81331600 | -1.14829600 | -0.01047200 |                                                          |
| C                     | -3.65521500 | -0.04137400 | 0.03455600  |                                                          |
| C                     | 1.57673400  | 1.15558800  | -0.06826900 |                                                          |
| C                     | 2.11175800  | -1.65809600 | -0.13495400 |                                                          |
| C                     | 2.93547500  | 0.66663400  | -0.11166500 |                                                          |
| C                     | 3.15221200  | -0.77589200 | -0.14001800 |                                                          |
| C                     | -4.13528100 | 2.42509800  | 0.10180400  |                                                          |
| C                     | -5.58815900 | -1.42284600 | 0.05220800  |                                                          |
| H                     | -0.48647400 | -2.80803600 | -0.10487400 |                                                          |
| H                     | -1.40161600 | 2.50070600  | 0.03665300  |                                                          |
| H                     | -3.19392100 | -2.16021900 | -0.02339100 |                                                          |
| H                     | 1.43218300  | 2.22916500  | -0.04523300 |                                                          |
| H                     | 2.28163500  | -2.72849600 | -0.15444200 |                                                          |
| H                     | 4.18144500  | -1.11519100 | -0.14704300 |                                                          |
| H                     | -4.76386600 | 2.36225100  | 0.99299900  |                                                          |
| H                     | -3.60792600 | 3.37897200  | 0.11101200  |                                                          |
| H                     | -4.80509000 | 2.40176300  | -0.76072800 |                                                          |
| H                     | -6.66432400 | -1.26907500 | 0.07871000  |                                                          |
| H                     | -5.32056900 | -1.96643600 | -0.85937300 |                                                          |
| H                     | -5.28150600 | -2.00213800 | 0.92887600  |                                                          |
| H                     | 5.53656100  | 0.84857600  | -0.35648400 |                                                          |
| O                     | 6.39029100  | 0.36585500  | -0.39577600 |                                                          |
| O                     | 6.25831900  | -0.51649100 | 0.71440800  |                                                          |
| H                     | 6.80507800  | -0.08860900 | 1.38223600  |                                                          |
| <b>Name</b>           |             |             |             | <b>GLD-O9-HOO-POST-COMPLEX (P)</b>                       |
| Cartesian Coordinates |             |             |             | Frequency and Energy                                     |
| O                     | -4.60192900 | 0.52230300  | 0.10106400  | Zero-point correction= 0.259220 (Hartree/Particle)       |
| O                     | 4.41126000  | -0.20077800 | -0.55824900 | Thermal correction to Energy= 0.277361                   |
| N                     | -0.52770700 | -2.21106000 | 0.24001600  | Thermal correction to Enthalpy= 0.278305                 |
| C                     | -0.51348800 | 0.02174700  | -0.17508300 | Thermal correction to Gibbs Free Energy= 0.211894        |
| C                     | 0.85476600  | -0.47220300 | -0.20742100 | Sum of electronic and zero-point Energies= -897.108712   |
| C                     | -1.33190400 | -1.07953600 | 0.10491300  | Sum of electronic and thermal Energies= -897.090571      |

|                       |             |             |             |                                              |                             |
|-----------------------|-------------|-------------|-------------|----------------------------------------------|-----------------------------|
| C                     | 0.77313400  | -1.87767900 | 0.05603300  | Sum of electronic and thermal Enthalpies=    | -897.089627                 |
| C                     | -1.10432600 | 1.27459200  | -0.36073900 | Sum of electronic and thermal Free Energies= | -897.156038                 |
| C                     | -2.47810100 | 1.41807900  | -0.26475200 |                                              |                             |
| C                     | -2.71626200 | -0.98368700 | 0.21205400  |                                              |                             |
| C                     | -3.27297900 | 0.27892200  | 0.02504900  |                                              |                             |
| C                     | 2.07772200  | 0.11021400  | -0.42078200 |                                              |                             |
| C                     | 1.91717800  | -2.70754600 | 0.09273300  |                                              |                             |
| C                     | 3.27286300  | -0.70092900 | -0.37973400 |                                              |                             |
| C                     | 3.13137900  | -2.12746100 | -0.12444000 |                                              |                             |
| C                     | -3.15375400 | 2.74614100  | -0.45906000 |                                              |                             |
| C                     | -5.46619300 | -0.56736600 | 0.37939000  |                                              |                             |
| H                     | -0.86635800 | -3.14391100 | 0.43428100  |                                              |                             |
| H                     | -0.49360400 | 2.14309200  | -0.58561300 |                                              |                             |
| H                     | -3.31609100 | -1.85671600 | 0.43105000  |                                              |                             |
| H                     | 2.18344400  | 1.16835700  | -0.63544800 |                                              |                             |
| H                     | 1.81942100  | -3.76908700 | 0.28966300  |                                              |                             |
| H                     | 4.04449400  | -2.71056500 | -0.10622700 |                                              |                             |
| H                     | -3.70834400 | 3.04038800  | 0.43566000  |                                              |                             |
| H                     | -2.41715100 | 3.51921500  | -0.68061800 |                                              |                             |
| H                     | -3.87414200 | 2.70476600  | -1.27990200 |                                              |                             |
| H                     | -6.47359600 | -0.15671800 | 0.39742100  |                                              |                             |
| H                     | -5.39978400 | -1.33154400 | -0.40079600 |                                              |                             |
| H                     | -5.23824800 | -1.01146800 | 1.35290400  |                                              |                             |
| H                     | 4.54976800  | 1.50583400  | -0.30776200 |                                              |                             |
| O                     | 4.50635800  | 2.45097000  | -0.03498800 |                                              |                             |
| O                     | 4.14965000  | 2.32551700  | 1.33858000  |                                              |                             |
| H                     | 3.22121900  | 2.59196400  | 1.33504800  |                                              |                             |
| <b>Name</b>           |             |             |             | <b>GLD-O9-HOO-POST-COMPLEX (H)</b>           |                             |
| Cartesian Coordinates |             |             |             | Frequency and Energy                         |                             |
| O                     | -4.60788500 | 0.52989200  | 0.07816000  | Zero-point correction=                       | 0.258968 (Hartree/Particle) |
| O                     | 4.41769600  | -0.21387500 | -0.47474900 | Thermal correction to Energy=                | 0.276906                    |
| N                     | -0.54183200 | -2.21913000 | 0.19640800  | Thermal correction to Enthalpy=              | 0.277850                    |
| C                     | -0.51278500 | 0.02656400  | -0.15719100 | Thermal correction to Gibbs Free Energy=     | 0.212041                    |
| C                     | 0.85341900  | -0.47302800 | -0.17800400 | Sum of electronic and zero-point Energies=   | -897.112757                 |
| C                     | -1.33940600 | -1.07898800 | 0.07597200  | Sum of electronic and thermal Energies=      | -897.094819                 |
| C                     | 0.75854700  | -1.88602500 | 0.04915400  | Sum of electronic and thermal Enthalpies=    | -897.093875                 |
| C                     | -1.09309400 | 1.28759300  | -0.30948600 | Sum of electronic and thermal Free Energies= | -897.159684                 |
| C                     | -2.46933200 | 1.43251900  | -0.22844600 |                                              |                             |
| C                     | -2.72322700 | -0.98375200 | 0.16451900  |                                              |                             |
| C                     | -3.27022600 | 0.28732600  | 0.01049100  |                                              |                             |
| C                     | 2.08055800  | 0.10862600  | -0.35748100 |                                              |                             |
| C                     | 1.89851900  | -2.72209600 | 0.09330900  |                                              |                             |
| C                     | 3.26418300  | -0.71367200 | -0.31543100 |                                              |                             |
| C                     | 3.11758300  | -2.14118100 | -0.08671200 |                                              |                             |
| C                     | -3.13093900 | 2.77289000  | -0.38396500 |                                              |                             |
| C                     | -5.47245600 | -0.57266500 | 0.33385500  |                                              |                             |
| H                     | -0.88948400 | -3.15662600 | 0.35897800  |                                              |                             |
| H                     | -0.47420100 | 2.15974300  | -0.49302400 |                                              |                             |
| H                     | -3.32656400 | -1.86233900 | 0.34808700  |                                              |                             |
| H                     | 2.19389300  | 1.17224300  | -0.54076900 |                                              |                             |
| H                     | 1.78966200  | -3.78619900 | 0.26646800  |                                              |                             |
| H                     | 4.02679100  | -2.73039100 | -0.06361400 |                                              |                             |
| H                     | -3.69872000 | 3.03990500  | 0.51111700  |                                              |                             |
| H                     | -2.38159600 | 3.54493700  | -0.56018700 |                                              |                             |

|                       |             |             |             |                                                          |
|-----------------------|-------------|-------------|-------------|----------------------------------------------------------|
| H                     | -3.83261200 | 2.77267900  | -1.22198100 |                                                          |
| H                     | -6.48022100 | -0.16419700 | 0.35504900  |                                                          |
| H                     | -5.39459300 | -1.31999300 | -0.45969500 |                                                          |
| H                     | -5.24068100 | -1.03012700 | 1.29900900  |                                                          |
| H                     | 4.56015000  | 1.46173200  | -0.36340800 |                                                          |
| O                     | 4.58052400  | 2.41917200  | -0.11144100 |                                                          |
| O                     | 4.11109600  | 2.36930100  | 1.23135300  |                                                          |
| H                     | 3.16149200  | 2.53194300  | 1.13902700  |                                                          |
| <b>Name</b>           |             |             |             | <b>GLD-N-HOO-PRE-COMPLEX (G)</b>                         |
| Cartesian Coordinates |             |             |             | Frequency and Energy                                     |
| O                     | 4.26757300  | 0.01873500  | -0.09033500 | Zero-point correction= 0.258883 (Hartree/Particle)       |
| O                     | -4.72939800 | -1.55062500 | -0.24997200 | Thermal correction to Energy= 0.277402                   |
| N                     | -0.29638700 | 1.66056300  | -0.83177600 | Thermal correction to Enthalpy= 0.278346                 |
| C                     | 0.17765700  | -0.50077500 | -0.32003000 | Thermal correction to Gibbs Free Energy= 0.211477        |
| C                     | -1.25758500 | -0.35990700 | -0.42256300 | Sum of electronic and zero-point Energies= -897.069908   |
| C                     | 0.72326800  | 0.77273800  | -0.54815200 | Sum of electronic and thermal Energies= -897.051389      |
| C                     | -1.50850000 | 0.99944800  | -0.70667800 | Sum of electronic and thermal Enthalpies= -897.050445    |
| C                     | 1.03495500  | -1.57173000 | -0.03822400 | Sum of electronic and thermal Free Energies= -897.117314 |
| C                     | 2.39904700  | -1.37622500 | 0.02953700  |                                                          |
| C                     | 2.09874200  | 1.00992400  | -0.48625000 |                                                          |
| C                     | 2.91544000  | -0.07201500 | -0.19239500 |                                                          |
| C                     | -2.33200800 | -1.24760300 | -0.26402100 |                                                          |
| C                     | -2.80913300 | 1.48627900  | -0.81789000 |                                                          |
| C                     | -3.62480200 | -0.75776700 | -0.38584800 |                                                          |
| C                     | -3.86074400 | 0.60026700  | -0.65205500 |                                                          |
| C                     | 3.35756200  | -2.49217000 | 0.34065400  |                                                          |
| C                     | 4.86170100  | 1.28686900  | -0.26574800 |                                                          |
| H                     | -0.20006400 | 2.66049200  | -0.76716600 |                                                          |
| H                     | 0.63213900  | -2.56445300 | 0.13595900  |                                                          |
| H                     | 2.49668800  | 2.00043000  | -0.65824500 |                                                          |
| H                     | -2.15580200 | -2.29837200 | -0.05418900 |                                                          |
| H                     | -3.00133100 | 2.53234900  | -1.02470600 |                                                          |
| H                     | -4.88763500 | 0.93469300  | -0.72599400 |                                                          |
| H                     | 3.92768800  | -2.27505100 | 1.24693200  |                                                          |
| H                     | 2.81842400  | -3.42917700 | 0.48262900  |                                                          |
| H                     | 4.08285400  | -2.62382400 | -0.46554100 |                                                          |
| H                     | 5.93069100  | 1.14176500  | -0.12648200 |                                                          |
| H                     | 4.67494200  | 1.67471800  | -1.27229200 |                                                          |
| H                     | 4.49066000  | 2.00110400  | 0.47609000  |                                                          |
| H                     | -4.45978100 | -2.45967300 | -0.09671500 |                                                          |
| O                     | -0.77057500 | 1.46847600  | 2.22485700  |                                                          |
| O                     | -1.69352900 | 0.59807100  | 2.53436000  |                                                          |
| H                     | -1.92092100 | 0.13980500  | 1.69885600  |                                                          |
| <b>Name</b>           |             |             |             | <b>GLD-N-HOO-PRE-COMPLEX (P)</b>                         |
| Cartesian Coordinates |             |             |             | Frequency and Energy                                     |
| O                     | 4.16709000  | -0.33819800 | -0.03544200 | Zero-point correction= 0.258076 (Hartree/Particle)       |
| O                     | -4.77289000 | -2.23659900 | 0.10664400  | Thermal correction to Energy= 0.276754                   |
| N                     | -0.48538500 | 1.18836600  | -0.28297800 | Thermal correction to Enthalpy= 0.277698                 |
| C                     | 0.08291100  | -0.98997200 | -0.00266100 | Thermal correction to Gibbs Free Energy= 0.209905        |
| C                     | -1.36045500 | -0.89562900 | -0.03307300 | Sum of electronic and zero-point Energies= -897.092671   |
| C                     | 0.57466600  | 0.31963000  | -0.16085000 | Sum of electronic and thermal Energies= -897.073993      |
| C                     | -1.66804800 | 0.47122100  | -0.20682800 | Sum of electronic and thermal Enthalpies= -897.073049    |
| C                     | 0.99366800  | -2.04521000 | 0.14344900  | Sum of electronic and thermal Free Energies= -897.140842 |
| C                     | 2.35449600  | -1.80558100 | 0.13083500  |                                                          |

|                       |             |             |             |                                                          |
|-----------------------|-------------|-------------|-------------|----------------------------------------------------------|
| C                     | 1.94575000  | 0.60131100  | -0.17766700 |                                                          |
| C                     | 2.81516100  | -0.47043900 | -0.03304700 |                                                          |
| C                     | -2.39314900 | -1.83424200 | 0.07552600  |                                                          |
| C                     | -2.98778200 | 0.91460300  | -0.27182600 |                                                          |
| C                     | -3.70348000 | -1.38747100 | 0.00888800  |                                                          |
| C                     | -3.99975500 | -0.02599700 | -0.16295500 |                                                          |
| C                     | 3.36126600  | -2.91259600 | 0.28542900  |                                                          |
| C                     | 4.70582200  | 0.96301300  | -0.18657200 |                                                          |
| H                     | -0.40678400 | 2.19036300  | -0.39457100 |                                                          |
| H                     | 0.63520000  | -3.06253000 | 0.26743500  |                                                          |
| H                     | 2.29702900  | 1.61722900  | -0.29993000 |                                                          |
| H                     | -2.17691600 | -2.88994900 | 0.21073200  |                                                          |
| H                     | -3.22070000 | 1.96510500  | -0.40359600 |                                                          |
| H                     | -5.03979800 | 0.27499000  | -0.20744000 |                                                          |
| H                     | 4.00653400  | -2.74278300 | 1.15134400  |                                                          |
| H                     | 2.85536000  | -3.87068300 | 0.41339400  |                                                          |
| H                     | 4.01428400  | -2.98086000 | -0.58873200 |                                                          |
| H                     | 5.78777000  | 0.84510100  | -0.17528900 |                                                          |
| H                     | 4.39978200  | 1.40934500  | -1.13763500 |                                                          |
| H                     | 4.40425700  | 1.61441100  | 0.63967900  |                                                          |
| H                     | -4.45677400 | -3.13851000 | 0.22601600  |                                                          |
| O                     | -0.07375300 | 4.24959800  | -0.18576600 |                                                          |
| O                     | -0.96843500 | 4.52183000  | 0.72225800  |                                                          |
| H                     | -0.84408100 | 5.46133100  | 0.96599500  |                                                          |
| <b>Name</b>           |             |             |             | <b>GLD-N-HOO-PRE-COMPLEX (H)</b>                         |
| Cartesian Coordinates |             |             |             | Frequency and Energy                                     |
| O                     | 4.24687900  | -0.02752000 | -0.00433800 | Zero-point correction= 0.257901 (Hartree/Particle)       |
| O                     | -4.54538600 | -2.57375700 | 0.01457200  | Thermal correction to Energy= 0.276494                   |
| N                     | -0.50750800 | 1.17526600  | -0.10143800 | Thermal correction to Enthalpy= 0.277439                 |
| C                     | 0.21499900  | -0.97513900 | 0.01143800  | Thermal correction to Gibbs Free Energy= 0.209844        |
| C                     | -1.23150600 | -0.98154000 | -0.01051800 | Sum of electronic and zero-point Energies= -897.094400   |
| C                     | 0.61074500  | 0.37498100  | -0.05145100 | Sum of electronic and thermal Energies= -897.075807      |
| C                     | -1.63385700 | 0.37015100  | -0.08369100 | Sum of electronic and thermal Enthalpies= -897.074863    |
| C                     | 1.19818200  | -1.97215300 | 0.07486700  | Sum of electronic and thermal Free Energies= -897.142458 |
| C                     | 2.53938400  | -1.63513700 | 0.07124900  |                                                          |
| C                     | 1.95809600  | 0.75385900  | -0.05793900 |                                                          |
| C                     | 2.90022900  | -0.26203700 | 0.00061000  |                                                          |
| C                     | -2.19476900 | -1.99646200 | 0.02317800  |                                                          |
| C                     | -2.98122900 | 0.72548200  | -0.12324600 |                                                          |
| C                     | -3.53135100 | -1.63480400 | -0.01704400 |                                                          |
| C                     | -3.92529000 | -0.28962100 | -0.09049100 |                                                          |
| C                     | 3.61941700  | -2.68013300 | 0.13709100  |                                                          |
| C                     | 4.68189000  | 1.32328800  | -0.10644400 |                                                          |
| H                     | -0.50863400 | 2.18586900  | -0.18610500 |                                                          |
| H                     | 0.91315100  | -3.01854400 | 0.12607400  |                                                          |
| H                     | 2.23362400  | 1.79854700  | -0.10889800 |                                                          |
| H                     | -1.91177600 | -3.04312700 | 0.07918700  |                                                          |
| H                     | -3.28477300 | 1.76443100  | -0.17863300 |                                                          |
| H                     | -4.98364300 | -0.05808200 | -0.11918200 |                                                          |
| H                     | 4.27467600  | -2.52085400 | 0.99744900  |                                                          |
| H                     | 3.17696200  | -3.67338400 | 0.22185200  |                                                          |
| H                     | 4.25091400  | -2.65946800 | -0.75536600 |                                                          |
| H                     | 5.76921100  | 1.28802300  | -0.11126900 |                                                          |

|                       |             |             |             |                                                          |
|-----------------------|-------------|-------------|-------------|----------------------------------------------------------|
| H                     | 4.32503000  | 1.77743900  | -1.03439300 |                                                          |
| H                     | 4.33850800  | 1.90957900  | 0.74976100  |                                                          |
| H                     | -4.16478900 | -3.45930100 | 0.06431600  |                                                          |
| O                     | -0.72275700 | 4.20457200  | -0.28159100 |                                                          |
| O                     | -1.76541100 | 4.33035100  | 0.48495600  |                                                          |
| H                     | -1.93215800 | 5.28842800  | 0.59083200  |                                                          |
| <b>Name</b>           |             |             |             | <b>GLD-N-HOO-POST-COMPLEX (G)</b>                        |
| Cartesian Coordinates |             |             |             | Frequency and Energy                                     |
| O                     | 4.26865200  | 0.16818700  | 0.00320900  | Zero-point correction= 0.258533 (Hartree/Particle)       |
| O                     | -4.43088300 | -2.59335300 | -0.00386200 | Thermal correction to Energy= 0.276949                   |
| N                     | -0.52152600 | 1.19337200  | -0.07810000 | Thermal correction to Enthalpy= 0.277893                 |
| C                     | 0.30351600  | -0.98035900 | 0.00550200  | Thermal correction to Gibbs Free Energy= 0.210396        |
| C                     | -1.15279600 | -1.03001400 | -0.00955600 | Sum of electronic and zero-point Energies= -897.069394   |
| C                     | 0.61933700  | 0.39150600  | -0.03874900 | Sum of electronic and thermal Energies= -897.050978      |
| C                     | -1.56321300 | 0.35070700  | -0.05834200 | Sum of electronic and thermal Enthalpies= -897.050034    |
| C                     | 1.31989900  | -1.92272400 | 0.05058000  | Sum of electronic and thermal Free Energies= -897.117532 |
| C                     | 2.65221500  | -1.51181200 | 0.05057900  |                                                          |
| C                     | 1.93783300  | 0.83374600  | -0.04232000 |                                                          |
| C                     | 2.94458100  | -0.13293800 | 0.00223500  |                                                          |
| C                     | -2.09226800 | -2.03301600 | 0.00884900  |                                                          |
| C                     | -2.93600300 | 0.69325400  | -0.08325500 |                                                          |
| C                     | -3.45176100 | -1.66638500 | -0.01982400 |                                                          |
| C                     | -3.86575800 | -0.31907500 | -0.06473200 |                                                          |
| C                     | 3.78768900  | -2.49433400 | 0.10097200  |                                                          |
| C                     | 4.63776000  | 1.53195200  | -0.05373200 |                                                          |
| H                     | -0.77821400 | 2.97330400  | -0.29196700 |                                                          |
| H                     | 1.09806700  | -2.98470400 | 0.08660600  |                                                          |
| H                     | 2.14829800  | 1.89396800  | -0.07893500 |                                                          |
| H                     | -1.81258100 | -3.08199000 | 0.04354100  |                                                          |
| H                     | -3.22088000 | 1.73919400  | -0.10542700 |                                                          |
| H                     | -4.92885200 | -0.11719100 | -0.08196400 |                                                          |
| H                     | 4.42573600  | -2.30568300 | 0.96749000  |                                                          |
| H                     | 3.41042800  | -3.51557500 | 0.15700300  |                                                          |
| H                     | 4.42287900  | -2.40178000 | -0.78335400 |                                                          |
| H                     | 5.72502600  | 1.54939100  | -0.04710000 |                                                          |
| H                     | 4.27002900  | 2.00076400  | -0.97137900 |                                                          |
| H                     | 4.25835400  | 2.07923200  | 0.81452400  |                                                          |
| H                     | -4.05505000 | -3.47832200 | 0.02395500  |                                                          |
| O                     | -1.06997800 | 3.91334000  | -0.34096000 |                                                          |
| O                     | -2.28311500 | 3.85505700  | 0.40363000  |                                                          |
| H                     | -2.03613900 | 4.28690000  | 1.22832400  |                                                          |
| <b>Name</b>           |             |             |             | <b>GLD-N-HOO-POST-COMPLEX (P)</b>                        |
| Cartesian Coordinates |             |             |             | Frequency and Energy                                     |
| O                     | 4.24858700  | 0.09764800  | 0.00326200  | Zero-point correction= 0.258055 (Hartree/Particle)       |
| O                     | -4.48177500 | -2.53301700 | -0.00211500 | Thermal correction to Energy= 0.276421                   |
| N                     | -0.52580100 | 1.19643000  | -0.09792400 | Thermal correction to Enthalpy= 0.277365                 |
| C                     | 0.26743100  | -0.98796400 | 0.00530100  | Thermal correction to Gibbs Free Energy= 0.210247        |
| C                     | -1.18847100 | -1.01680400 | -0.01263600 | Sum of electronic and zero-point Energies= -897.097162   |
| C                     | 0.60639700  | 0.37790600  | -0.05015800 | Sum of electronic and thermal Energies= -897.078796      |
| C                     | -1.57851300 | 0.37132900  | -0.07376200 | Sum of electronic and thermal Enthalpies= -897.077851    |
| C                     | 1.26817100  | -1.94800700 | 0.06482700  | Sum of electronic and thermal Free Energies= -897.144970 |
| C                     | 2.60715500  | -1.55879800 | 0.06431400  |                                                          |
| C                     | 1.93171200  | 0.79979900  | -0.05366000 |                                                          |
| C                     | 2.92357600  | -0.18399700 | 0.00289200  |                                                          |

|                       |             |             |             |                                                          |
|-----------------------|-------------|-------------|-------------|----------------------------------------------------------|
| C                     | -2.13845900 | -2.00849200 | 0.01558600  |                                                          |
| C                     | -2.94874400 | 0.73065600  | -0.09937400 |                                                          |
| C                     | -3.49391200 | -1.62313900 | -0.01954100 |                                                          |
| C                     | -3.89097500 | -0.26723200 | -0.07354700 |                                                          |
| C                     | 3.72123700  | -2.56442400 | 0.12432600  |                                                          |
| C                     | 4.64028500  | 1.45932700  | -0.08141000 |                                                          |
| H                     | -0.69878900 | 2.94328500  | -0.29679500 |                                                          |
| H                     | 1.02680900  | -3.00555400 | 0.10981500  |                                                          |
| H                     | 2.16426900  | 1.85577100  | -0.09818200 |                                                          |
| H                     | -1.87226000 | -3.06019800 | 0.06242400  |                                                          |
| H                     | -3.22711500 | 1.77798100  | -0.13055300 |                                                          |
| H                     | -4.95101200 | -0.04641700 | -0.09207300 |                                                          |
| H                     | 4.36558400  | -2.38493500 | 0.98877000  |                                                          |
| H                     | 3.31976300  | -3.57613200 | 0.19296200  |                                                          |
| H                     | 4.35696100  | -2.50116700 | -0.76296300 |                                                          |
| H                     | 5.72855000  | 1.45884000  | -0.07981800 |                                                          |
| H                     | 4.27828600  | 1.91606900  | -1.00703700 |                                                          |
| H                     | 4.27653600  | 2.02807500  | 0.77932000  |                                                          |
| H                     | -4.11798500 | -3.42709000 | 0.03495000  |                                                          |
| O                     | -0.90072200 | 3.91176300  | -0.35566800 |                                                          |
| O                     | -2.06741800 | 3.99903200  | 0.45747600  |                                                          |
| H                     | -1.71970200 | 4.36209900  | 1.28207100  |                                                          |
| <b>Name</b>           |             |             |             | <b>GLD-N-HOO-POST-COMPLEX (H)</b>                        |
| Cartesian Coordinates |             |             |             | Frequency and Energy                                     |
| O                     | 4.19878800  | -0.11692700 | -0.00256500 | Zero-point correction= 0.257106 (Hartree/Particle)       |
| O                     | -4.65105300 | -2.32662400 | -0.00643100 | Thermal correction to Energy= 0.275426                   |
| N                     | -0.52124000 | 1.21565900  | -0.07284200 | Thermal correction to Enthalpy= 0.276370                 |
| C                     | 0.16426700  | -1.00620900 | 0.01640300  | Thermal correction to Gibbs Free Energy= 0.209235        |
| C                     | -1.29084200 | -0.96240000 | -0.00178600 | Sum of electronic and zero-point Energies= -897.100888   |
| C                     | 0.57102800  | 0.33964200  | -0.03039800 | Sum of electronic and thermal Energies= -897.082568      |
| C                     | -1.61429500 | 0.44373200  | -0.05485100 | Sum of electronic and thermal Enthalpies= -897.081624    |
| C                     | 1.11482100  | -2.01718800 | 0.06292000  | Sum of electronic and thermal Free Energies= -897.148759 |
| C                     | 2.47203600  | -1.69451400 | 0.05928000  |                                                          |
| C                     | 1.91485900  | 0.69717500  | -0.03709500 |                                                          |
| C                     | 2.85388300  | -0.33664900 | 0.00525400  |                                                          |
| C                     | -2.28142400 | -1.91189200 | 0.01485800  |                                                          |
| C                     | -2.96794800 | 0.86478900  | -0.08530400 |                                                          |
| C                     | -3.61846500 | -1.46456900 | -0.01912400 |                                                          |
| C                     | -3.95312400 | -0.08926100 | -0.06752000 |                                                          |
| C                     | 3.53022900  | -2.75952600 | 0.10691000  |                                                          |
| C                     | 4.65327100  | 1.22998100  | -0.09507500 |                                                          |
| H                     | -0.35861800 | 2.90383900  | -0.24039200 |                                                          |
| H                     | 0.81803100  | -3.06053000 | 0.10100000  |                                                          |
| H                     | 2.20246200  | 1.73994200  | -0.07522100 |                                                          |
| H                     | -2.07043600 | -2.97591000 | 0.05108400  |                                                          |
| H                     | -3.20757300 | 1.92123700  | -0.12230500 |                                                          |
| H                     | -5.00193300 | 0.18015100  | -0.08949700 |                                                          |
| H                     | 4.19600300  | -2.61559700 | 0.96173800  |                                                          |
| H                     | 3.07191800  | -3.74549600 | 0.18706200  |                                                          |
| H                     | 4.15306000  | -2.73830000 | -0.79162400 |                                                          |
| H                     | 5.73958900  | 1.17669500  | -0.10849700 |                                                          |
| H                     | 4.29632300  | 1.69693100  | -1.01624200 |                                                          |
| H                     | 4.32564100  | 1.81171600  | 0.76994800  |                                                          |
| H                     | -4.34112600 | -3.24266300 | 0.02799100  |                                                          |

|                       |             |             |             |                                                          |
|-----------------------|-------------|-------------|-------------|----------------------------------------------------------|
| O                     | -0.30827600 | 3.90212400  | -0.29613000 |                                                          |
| O                     | -1.51792600 | 4.28804500  | 0.34900100  |                                                          |
| H                     | -1.23669300 | 4.46676800  | 1.25700400  |                                                          |
| <b>Name</b>           |             |             |             | <b>TS-N-H-OOH (G)</b>                                    |
| Cartesian Coordinates |             |             |             | Frequency and Energy                                     |
| O                     | 4.24318300  | -0.01307800 | -0.03857300 | Zero-point correction= 0.254280 (Hartree/Particle)       |
| O                     | -4.62061400 | -2.19497700 | 0.17288000  | Thermal correction to Energy= 0.271710                   |
| N                     | -0.45287900 | 1.26307600  | -0.65247100 | Thermal correction to Enthalpy= 0.272654                 |
| C                     | 0.20201300  | -0.86527300 | -0.05127200 | Thermal correction to Gibbs Free Energy= 0.208575        |
| C                     | -1.25321200 | -0.82183700 | -0.09982500 | Sum of electronic and zero-point Energies= -897.047292   |
| C                     | 0.63239300  | 0.43421500  | -0.35887700 | Sum of electronic and thermal Energies= -897.029862      |
| C                     | -1.58697000 | 0.51569400  | -0.44475300 | Sum of electronic and thermal Enthalpies= -897.028918    |
| C                     | 1.14493300  | -1.85021200 | 0.22651200  | Sum of electronic and thermal Free Energies= -897.092998 |
| C                     | 2.49916800  | -1.54021300 | 0.22173800  |                                                          |
| C                     | 1.97989800  | 0.78403000  | -0.37029200 |                                                          |
| C                     | 2.90080600  | -0.21648500 | -0.07084700 |                                                          |
| C                     | -2.25215300 | -1.75677200 | 0.10084700  |                                                          |
| C                     | -2.92149200 | 0.92004400  | -0.56982500 |                                                          |
| C                     | -3.58387600 | -1.33951400 | -0.01665800 |                                                          |
| C                     | -3.91439800 | -0.01717500 | -0.34316600 |                                                          |
| C                     | 3.55311900  | -2.56890700 | 0.51979200  |                                                          |
| C                     | 4.72287000  | 1.28619000  | -0.32099600 |                                                          |
| H                     | -0.44383600 | 2.36143600  | -0.26045600 |                                                          |
| H                     | 0.83775900  | -2.86611900 | 0.45342400  |                                                          |
| H                     | 2.27512700  | 1.79826600  | -0.60171700 |                                                          |
| H                     | -2.02117400 | -2.78933300 | 0.34542000  |                                                          |
| H                     | -3.16094000 | 1.94196500  | -0.83306900 |                                                          |
| H                     | -4.96223800 | 0.24183100  | -0.42279200 |                                                          |
| H                     | 4.14399000  | -2.28010300 | 1.39233700  |                                                          |
| H                     | 3.09719300  | -3.54090300 | 0.70960600  |                                                          |
| H                     | 4.25103000  | -2.66426500 | -0.31520300 |                                                          |
| H                     | 5.80578300  | 1.23216000  | -0.23545600 |                                                          |
| H                     | 4.45154900  | 1.59374500  | -1.33556800 |                                                          |
| H                     | 4.33479800  | 2.01392800  | 0.39805000  |                                                          |
| H                     | -4.29053600 | -3.07123300 | 0.38900400  |                                                          |
| O                     | -0.51825800 | 3.34736200  | 0.55381200  |                                                          |
| O                     | -1.85651800 | 3.38698800  | 0.87753800  |                                                          |
| H                     | -1.86928400 | 3.19401100  | 1.82418700  |                                                          |
| <b>Name</b>           |             |             |             | <b>TS-N-H-OOH (P)</b>                                    |
| Cartesian Coordinates |             |             |             | Frequency and Energy                                     |
| O                     | 4.24358900  | -0.01315100 | -0.04664600 | Zero-point correction= 0.253516 (Hartree/Particle)       |
| O                     | -4.61125800 | -2.21013000 | 0.15779800  | Thermal correction to Energy= 0.271212                   |
| N                     | -0.45502000 | 1.26208600  | -0.63739500 | Thermal correction to Enthalpy= 0.272156                 |
| C                     | 0.20268800  | -0.86337300 | -0.03373700 | Thermal correction to Gibbs Free Energy= 0.206789        |
| C                     | -1.25306900 | -0.82421000 | -0.09138300 | Sum of electronic and zero-point Energies= -897.073792   |
| C                     | 0.63447600  | 0.43557300  | -0.34162000 | Sum of electronic and thermal Energies= -897.056095      |
| C                     | -1.58949700 | 0.51194500  | -0.44201600 | Sum of electronic and thermal Enthalpies= -897.055151    |
| C                     | 1.14544200  | -1.84992200 | 0.24326000  | Sum of electronic and thermal Free Energies= -897.120518 |
| C                     | 2.50059800  | -1.53988200 | 0.23412100  |                                                          |
| C                     | 1.98187700  | 0.78536600  | -0.36235400 |                                                          |
| C                     | 2.90450200  | -0.21675700 | -0.06598900 |                                                          |
| C                     | -2.24757100 | -1.76471400 | 0.10325200  |                                                          |
| C                     | -2.92478400 | 0.91057500  | -0.58232100 |                                                          |
| C                     | -3.58098000 | -1.35186600 | -0.02701900 |                                                          |

|                       |             |             |             |                                                          |
|-----------------------|-------------|-------------|-------------|----------------------------------------------------------|
| C                     | -3.91506700 | -0.03096200 | -0.36258000 |                                                          |
| C                     | 3.54939100  | -2.57300800 | 0.53211300  |                                                          |
| C                     | 4.72488900  | 1.28363200  | -0.36378800 |                                                          |
| H                     | -0.44968300 | 2.34364500  | -0.26263400 |                                                          |
| H                     | 0.83694800  | -2.86536100 | 0.47118400  |                                                          |
| H                     | 2.28132900  | 1.79644700  | -0.60451800 |                                                          |
| H                     | -2.01492700 | -2.79545500 | 0.35379300  |                                                          |
| H                     | -3.17036000 | 1.92847600  | -0.85688900 |                                                          |
| H                     | -4.96254500 | 0.22825300  | -0.45459800 |                                                          |
| H                     | 4.14529800  | -2.28974600 | 1.40386200  |                                                          |
| H                     | 3.08646000  | -3.54120300 | 0.72640800  |                                                          |
| H                     | 4.24398600  | -2.68043300 | -0.30500600 |                                                          |
| H                     | 5.80935000  | 1.22695400  | -0.29222100 |                                                          |
| H                     | 4.44314800  | 1.57017400  | -1.38138800 |                                                          |
| H                     | 4.35255800  | 2.02664900  | 0.34740700  |                                                          |
| H                     | -4.27720000 | -3.08683500 | 0.38169900  |                                                          |
| O                     | -0.52706800 | 3.37719900  | 0.55560000  |                                                          |
| O                     | -1.86286800 | 3.42345600  | 0.89068000  |                                                          |
| H                     | -1.87574500 | 3.21046100  | 1.83558100  |                                                          |
| <b>Name</b>           |             |             |             | <b>TS-N-H-OOH (W)</b>                                    |
| Cartesian Coordinates |             |             |             | Frequency and Energy                                     |
| O                     | 4.24693900  | -0.00952800 | -0.04428800 | Zero-point correction= 0.253554 (Hartree/Particle)       |
| O                     | -4.61035400 | -2.19663500 | 0.16459000  | Thermal correction to Energy= 0.271264                   |
| N                     | -0.45247300 | 1.26347200  | -0.66190600 | Thermal correction to Enthalpy= 0.272208                 |
| C                     | 0.20560700  | -0.85811200 | -0.04926500 | Thermal correction to Gibbs Free Energy= 0.206939        |
| C                     | -1.25012800 | -0.81787000 | -0.10235400 | Sum of electronic and zero-point Energies= -897.077447   |
| C                     | 0.63921400  | 0.43866600  | -0.36200800 | Sum of electronic and thermal Energies= -897.059737      |
| C                     | -1.58685400 | 0.51832300  | -0.45446100 | Sum of electronic and thermal Enthalpies= -897.058793    |
| C                     | 1.14595200  | -1.84418300 | 0.23827300  | Sum of electronic and thermal Free Energies= -897.124062 |
| C                     | 2.50132500  | -1.53542100 | 0.23301700  |                                                          |
| C                     | 1.98648800  | 0.78839300  | -0.37647800 |                                                          |
| C                     | 2.90670700  | -0.21395000 | -0.07085700 |                                                          |
| C                     | -2.24349100 | -1.75701600 | 0.09977900  |                                                          |
| C                     | -2.92332700 | 0.91956900  | -0.58727500 |                                                          |
| C                     | -3.57809800 | -1.34265600 | -0.02492000 |                                                          |
| C                     | -3.91233900 | -0.02038500 | -0.36036300 |                                                          |
| C                     | 3.54871600  | -2.56826400 | 0.54207800  |                                                          |
| C                     | 4.72902700  | 1.29265200  | -0.34121600 |                                                          |
| H                     | -0.44752800 | 2.33083500  | -0.30565200 |                                                          |
| H                     | 0.83399700  | -2.85667800 | 0.47234900  |                                                          |
| H                     | 2.28925900  | 1.79821800  | -0.61744100 |                                                          |
| H                     | -2.01143200 | -2.78666300 | 0.35087700  |                                                          |
| H                     | -3.16869000 | 1.93738200  | -0.85970600 |                                                          |
| H                     | -4.95983100 | 0.23905700  | -0.44651600 |                                                          |
| H                     | 4.15369200  | -2.26607000 | 1.40017500  |                                                          |
| H                     | 3.08377400  | -3.52898800 | 0.76210200  |                                                          |
| H                     | 4.23305500  | -2.69486300 | -0.30026300 |                                                          |
| H                     | 5.81153000  | 1.23726500  | -0.26133200 |                                                          |
| H                     | 4.45095200  | 1.58965600  | -1.35566800 |                                                          |
| H                     | 4.34525700  | 2.02341700  | 0.37525800  |                                                          |
| H                     | -4.28762200 | -3.07768500 | 0.38509400  |                                                          |
| O                     | -0.54945200 | 3.37594300  | 0.55708700  |                                                          |
| O                     | -1.87628500 | 3.34714200  | 0.93133000  |                                                          |
| H                     | -1.85866800 | 3.07694300  | 1.86062700  |                                                          |



| Name                  |             |             |             | TS-O9-H-OOH (G)                              |                             |
|-----------------------|-------------|-------------|-------------|----------------------------------------------|-----------------------------|
| Cartesian Coordinates |             |             |             | Frequency and Energy                         |                             |
| O                     | -4.67493900 | 0.19574400  | 0.25352900  | Zero-point correction=                       | 0.254030 (Hartree/Particle) |
| O                     | 4.30523800  | 0.68229800  | -1.03864500 | Thermal correction to Energy=                | 0.271293                    |
| N                     | -0.29164400 | -2.01576700 | 0.08756700  | Thermal correction to Enthalpy=              | 0.272237                    |
| C                     | -0.57960600 | 0.20192200  | -0.28694300 | Thermal correction to Gibbs Free Energy=     | 0.207723                    |
| C                     | 0.83071000  | -0.11038600 | -0.41175500 | Sum of electronic and zero-point Energies=   | -897.052755                 |
| C                     | -1.23419300 | -0.99838400 | 0.02194200  | Sum of electronic and thermal Energies=      | -897.035491                 |
| C                     | 0.95717400  | -1.50443400 | -0.17056300 | Sum of electronic and thermal Enthalpies=    | -897.034547                 |
| C                     | -1.33302100 | 1.37407400  | -0.40649400 | Sum of electronic and thermal Free Energies= | -897.099062                 |
| C                     | -2.70227500 | 1.34872500  | -0.22108600 |                                              |                             |
| C                     | -2.61371900 | -1.06885200 | 0.21683700  |                                              |                             |
| C                     | -3.32924500 | 0.11569600  | 0.09070600  |                                              |                             |
| C                     | 1.96153300  | 0.63582700  | -0.70318800 |                                              |                             |
| C                     | 2.19489500  | -2.15785200 | -0.21225300 |                                              |                             |
| C                     | 3.21641300  | -0.00474100 | -0.74753300 |                                              |                             |
| C                     | 3.31022400  | -1.40146900 | -0.49139200 |                                              |                             |
| C                     | -3.55014800 | 2.58495500  | -0.33706100 |                                              |                             |
| C                     | -5.37762900 | -0.98608100 | 0.57403700  |                                              |                             |
| H                     | -0.49113400 | -2.98098300 | 0.29113500  |                                              |                             |
| H                     | -0.84702500 | 2.31411900  | -0.64613700 |                                              |                             |
| H                     | -3.09446100 | -2.00791300 | 0.45354500  |                                              |                             |
| H                     | 1.91644200  | 1.69898800  | -0.91290900 |                                              |                             |
| H                     | 2.27307700  | -3.22171400 | -0.02239300 |                                              |                             |
| H                     | 4.29714600  | -1.84568200 | -0.52568700 |                                              |                             |
| H                     | -4.07543200 | 2.78734800  | 0.59914200  |                                              |                             |
| H                     | -2.93288400 | 3.44830800  | -0.58629200 |                                              |                             |
| H                     | -4.31338500 | 2.46484900  | -1.10917900 |                                              |                             |
| H                     | -6.42390200 | -0.70180200 | 0.65932900  |                                              |                             |
| H                     | -5.26756400 | -1.73668800 | -0.21504800 |                                              |                             |
| H                     | -5.03375000 | -1.40185600 | 1.52645400  |                                              |                             |
| H                     | 4.68728600  | 1.15956000  | -0.11376800 |                                              |                             |
| O                     | 4.81644800  | 1.54530900  | 1.09710200  |                                              |                             |
| O                     | 4.01348800  | 0.68007000  | 1.77025700  |                                              |                             |
| H                     | 3.15853900  | 1.13247300  | 1.83937100  |                                              |                             |
| Name                  |             |             |             | TS-O9-H-OOH (P)                              |                             |
| Cartesian Coordinates |             |             |             | Frequency and Energy                         |                             |
| O                     | -4.65501500 | 0.22689900  | 0.23606400  | Zero-point correction=                       | 0.253898 (Hartree/Particle) |
| O                     | 4.34186100  | 0.56832200  | -1.02729400 | Thermal correction to Energy=                | 0.271241                    |
| N                     | -0.30180000 | -2.03564300 | 0.13579300  | Thermal correction to Enthalpy=              | 0.272186                    |
| C                     | -0.55906400 | 0.17818100  | -0.28885100 | Thermal correction to Gibbs Free Energy=     | 0.207660                    |
| C                     | 0.84695200  | -0.15645900 | -0.39995900 | Sum of electronic and zero-point Energies=   | -897.082239                 |
| C                     | -1.22959000 | -1.00904400 | 0.04358600  | Sum of electronic and thermal Energies=      | -897.064896                 |
| C                     | 0.94975700  | -1.54940300 | -0.12805400 | Sum of electronic and thermal Enthalpies=    | -897.063952                 |
| C                     | -1.29772700 | 1.35661000  | -0.44249800 | Sum of electronic and thermal Free Energies= | -897.128478                 |
| C                     | -2.66892300 | 1.34992000  | -0.26365900 |                                              |                             |
| C                     | -2.61096000 | -1.05941600 | 0.23463400  |                                              |                             |
| C                     | -3.31271600 | 0.13052200  | 0.07763700  |                                              |                             |
| C                     | 1.99030600  | 0.56676200  | -0.70113000 |                                              |                             |
| C                     | 2.17956600  | -2.22193000 | -0.15148700 |                                              |                             |
| C                     | 3.23305200  | -0.09632100 | -0.72224000 |                                              |                             |
| C                     | 3.30743400  | -1.48771700 | -0.44050500 |                                              |                             |
| C                     | -3.49626800 | 2.59507900  | -0.41983500 |                                              |                             |

|                       |             |             |             |                                                           |
|-----------------------|-------------|-------------|-------------|-----------------------------------------------------------|
| C                     | -5.36956600 | -0.94516700 | 0.59075900  |                                                           |
| H                     | -0.51647600 | -2.99713800 | 0.35917200  |                                                           |
| H                     | -0.79974300 | 2.28492800  | -0.70368100 |                                                           |
| H                     | -3.10119000 | -1.98847700 | 0.49175000  |                                                           |
| H                     | 1.95589600  | 1.62701300  | -0.93068100 |                                                           |
| H                     | 2.23751500  | -3.28338300 | 0.05885800  |                                                           |
| H                     | 4.28542600  | -1.95364700 | -0.46248700 |                                                           |
| H                     | -4.02896600 | 2.83432800  | 0.50411300  |                                                           |
| H                     | -2.86052800 | 3.44170000  | -0.68254400 |                                                           |
| H                     | -4.25204500 | 2.47357800  | -1.20015100 |                                                           |
| H                     | -6.41389400 | -0.64923600 | 0.66916400  |                                                           |
| H                     | -5.26962400 | -1.71665700 | -0.17877200 |                                                           |
| H                     | -5.03028300 | -1.33679400 | 1.55438300  |                                                           |
| H                     | 4.62666600  | 1.17223900  | -0.18067700 |                                                           |
| O                     | 4.72180400  | 1.69827800  | 1.03983900  |                                                           |
| O                     | 3.90211800  | 0.89760000  | 1.76641600  |                                                           |
| H                     | 3.02017700  | 1.30255400  | 1.70040700  |                                                           |
| <b>Name</b>           |             |             |             | <b>TS-O9-H-OOH (W)</b>                                    |
| Cartesian Coordinates |             |             |             | Frequency and Energy                                      |
| O                     | -4.65171200 | 0.23645800  | 0.22713200  | Zero-point correction= 0.253912 (Hartree/Particle)        |
| O                     | 4.35322100  | 0.53306100  | -1.03034100 | Thermal correction to Energy= 0.271346                    |
| N                     | -0.30548000 | -2.04092700 | 0.15580100  | Thermal correction to Enthalpy= 0.272290                  |
| C                     | -0.55319800 | 0.17116400  | -0.28721300 | Thermal correction to Gibbs Free Energy= 0.207144         |
| C                     | 0.85096800  | -0.17044700 | -0.39461100 | Sum of electronic and zero-point Energies= -897.0848978   |
| C                     | -1.22877800 | -1.01089500 | 0.05423800  | Sum of electronic and thermal Energies= -897.0674638      |
| C                     | 0.94758200  | -1.56173100 | -0.10994600 | Sum of electronic and thermal Enthalpies= -897.0665198    |
| C                     | -1.28708600 | 1.35225400  | -0.44754400 | Sum of electronic and thermal Free Energies= -897.1316658 |
| C                     | -2.65867000 | 1.35057800  | -0.27065000 |                                                           |
| C                     | -2.61076500 | -1.05617800 | 0.24226300  |                                                           |
| C                     | -3.30741200 | 0.13507300  | 0.07540200  |                                                           |
| C                     | 1.99724500  | 0.54520500  | -0.70159200 |                                                           |
| C                     | 2.17520700  | -2.23997500 | -0.12532600 |                                                           |
| C                     | 3.23538600  | -0.12453600 | -0.71332500 |                                                           |
| C                     | 3.30623600  | -1.51174600 | -0.41829700 |                                                           |
| C                     | -3.48346200 | 2.59786800  | -0.43348900 |                                                           |
| C                     | -5.37309100 | -0.93500800 | 0.57573900  |                                                           |
| H                     | -0.52413600 | -2.99765100 | 0.39083200  |                                                           |
| H                     | -0.78574700 | 2.27741100  | -0.71225700 |                                                           |
| H                     | -3.10295400 | -1.98209600 | 0.50490400  |                                                           |
| H                     | 1.96794000  | 1.60373000  | -0.93822100 |                                                           |
| H                     | 2.22947300  | -3.29933500 | 0.09274900  |                                                           |
| H                     | 4.28179200  | -1.98197800 | -0.43631700 |                                                           |
| H                     | -4.01806700 | 2.83812400  | 0.48853400  |                                                           |
| H                     | -2.84656600 | 3.44217100  | -0.69720300 |                                                           |
| H                     | -4.23683100 | 2.47133400  | -1.21458000 |                                                           |
| H                     | -6.41577300 | -0.63632800 | 0.64656100  |                                                           |
| H                     | -5.26330400 | -1.70425000 | -0.19312300 |                                                           |
| H                     | -5.03763500 | -1.32721500 | 1.53938600  |                                                           |
| H                     | 4.62356400  | 1.16190000  | -0.21815200 |                                                           |
| O                     | 4.72002500  | 1.72548000  | 1.02251600  |                                                           |
| O                     | 3.85468900  | 0.97336100  | 1.74352400  |                                                           |
| H                     | 2.99584300  | 1.42403400  | 1.67972500  |                                                           |
